# Supplementary material for: The transcription factor STAT6 plays a critical role in promoting beta cell viability and is depleted in islets of individuals with type 1 diabetes
Source: Springer Nature journal article supplement (doi:10.1007/s00125-018-4750-8), 2018-10-18
Supplement: MOESM1 [file 16209140]

**ESM Table 1: EASD and nPOD patient details.**

| <b>Case ID</b> | <b>Group</b>        | <b>Source</b>              | <b>Donor Status</b> | <b>Sex</b> | <b>Age (years)</b> | <b>Duration</b> |
|----------------|---------------------|----------------------------|---------------------|------------|--------------------|-----------------|
| <b>485 88</b>  | No diabetes control | UK Pancreas Biobank        | Autopsy             | F          | 2                  |                 |
| <b>146 66</b>  | No diabetes control | UK Pancreas Biobank        | Autopsy             | F          | 18                 |                 |
| <b>191 67</b>  | No diabetes control | UK Pancreas Biobank        | Autopsy             | M          | 25                 |                 |
| <b>330 71</b>  | No diabetes control | UK Pancreas Biobank        | Autopsy             | M          | 47                 |                 |
| <b>540 91</b>  | No diabetes control | UK Pancreas Biobank        | Autopsy             | M          | 11                 |                 |
| <b>21 89</b>   | No diabetes control | UK Pancreas Biobank        | Autopsy             | F          | 4                  |                 |
| <b>6013</b>    | No diabetes control | nPOD                       | Organ Donor         | M          | 65                 |                 |
| <b>6047</b>    | No diabetes control | nPOD                       | Organ Donor         | M          | 7                  |                 |
| <b>6095</b>    | No diabetes control | nPOD                       | Organ Donor         | M          | 40                 |                 |
| <b>6099</b>    | No diabetes control | nPOD                       | Organ Donor         | M          | 14                 |                 |
| <b>E560</b>    | Type 1 diabetes     | UK Type 1 diabetes Biobank | Organ Donor         | F          | 42                 | 1.5y            |
| <b>E567</b>    | Type 1 diabetes     | UK Type 1 diabetes Biobank | Autopsy             | F          | 11                 | < 1 week        |
| <b>E568</b>    | Type 1 diabetes     | UK Type 1 diabetes Biobank | Autopsy             | M          | 10                 | < 1 week        |
| <b>E375</b>    | Type 1 diabetes     | UK Type 1 diabetes Biobank | Autopsy             | F          | 11                 | 1 week          |
| <b>E514</b>    | Type 1 diabetes     | UK Type 1 diabetes Biobank | Autopsy             | M          | 23                 | 2 weeks         |
| <b>E207</b>    | Type 1 diabetes     | UK Type 1 diabetes Biobank | Autopsy             | F          | 3                  | 2 weeks         |
| <b>6209</b>    | Type 1 diabetes     | nPOD                       | Organ Donor         | F          | 5                  | 3 months        |
| <b>6228</b>    | Type 1 diabetes     | nPOD                       | Organ Donor         | M          | 13                 | 0               |
| <b>6243</b>    | Type 1 diabetes     | nPOD                       | Organ Donor         | M          | 13                 | 5 years         |
| <b>6245</b>    | Type 1 diabetes     | nPOD                       | Organ Donor         | M          | 22                 | 7y              |

**ESM Table 2: Antibody details and conditions of use.**

| <b>Antibody</b>                      | <b>Species raised</b> | <b>Dilution</b> | <b>Catalogue number</b> | <b>Company</b>  |
|--------------------------------------|-----------------------|-----------------|-------------------------|-----------------|
| <b>Anti-STAT6</b>                    | Rabbit                | 1:1000          | 5397S                   | Cell signalling |
| <b>Anti-STAT3</b>                    | Rabbit                | 1:1000          | #9132                   | Cell signalling |
| <b>Anti-SIRPA</b>                    | Rabbit                | 1:1000          | 13379S                  | Cell signalling |
| <b>Anti-MCL-1</b>                    | Rabbit                | 1:1000          | 94296S                  | Cell signalling |
| <b>Anti <math>\beta</math>-actin</b> | Mouse                 | 1:25000         | A5316                   | Sigma-Aldrich   |
| <b>Anti-pSTAT6</b>                   | Rabbit                | 1:500           | Sc-11762                | Santa Cruz      |
| <b>Anti-BCLxl</b>                    | Mouse                 | 1:1000          | 633901                  | Biologend       |
| <b>Anti-GAPDH</b>                    | Mouse                 | 1:10000         | 60004-1-Ig              | Proteintech     |
| <b>Anti-STAT6 (IHC)</b>              | Rabbit                | 1:500           | sc-981                  | Santa Cruz      |
| <b>Anti-mouse 600</b>                | Goat                  | 1:5000          | 35519                   | Invitrogen      |
| <b>Anti-Rabbit 800</b>               | Goat                  | 1:5000          | SA5-10036               | Invitrogen      |
| <b>Anti-mouse-AP</b>                 | Goat                  | 1:25000         | A3562                   | Sigma-Aldrich   |
| <b>Anti-Rabbit-AP</b>                | Goat                  | 1:25000         | A3687                   | Sigma-Aldrich   |
| <b>Anti-insulin</b>                  | Goat                  | 1:360           | A0564                   | Dako            |
| <b>Anti-glucagon</b>                 | Rabbit                | 1:2000          | ab92517                 | Abcam           |

**ESM Fig.1**

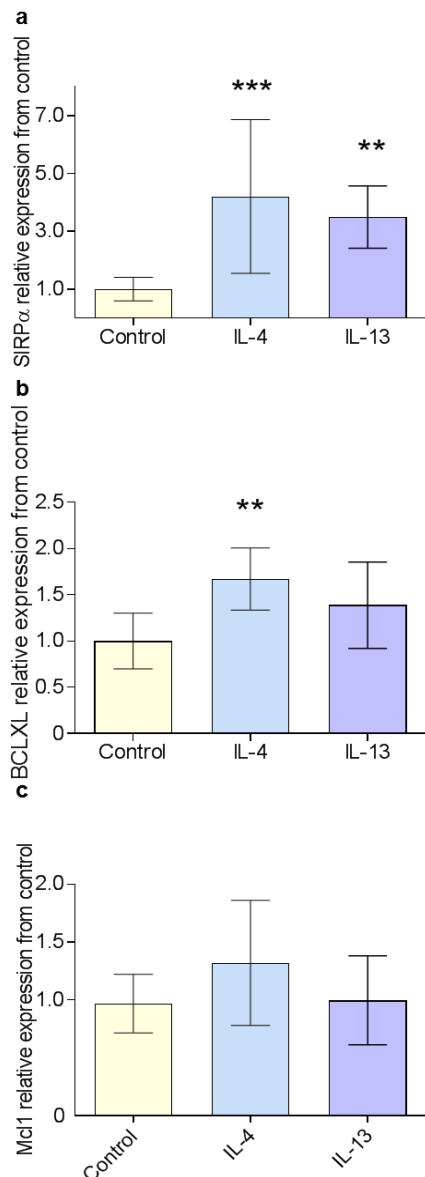

**ESM Fig. 1. IL-13 and IL-4 increase the expression of SIRP $\alpha$  and Bcl $\alpha$ L in INS-1E cells.**

Cells were treated with IL-4 ( $\diamond$ ) or IL-13 ( $\Delta$ ) for 48h before extraction of protein. Samples were analysed by Western blotting using antisera to probe for SIRP $\alpha$ , Bcl- $\alpha$ L, Mcl-1 and the loading control GAPDH (blots are presented in Fig. 4). The density of bands were calculated and normalised to GAPDH. Data are presented as fold change from untreated cells (control)  $\pm$ SEM, and are from three independent experiments. \*\* $p$ <0.01, \*\*\* $p$ <0.001.

**ESM Fig.2**

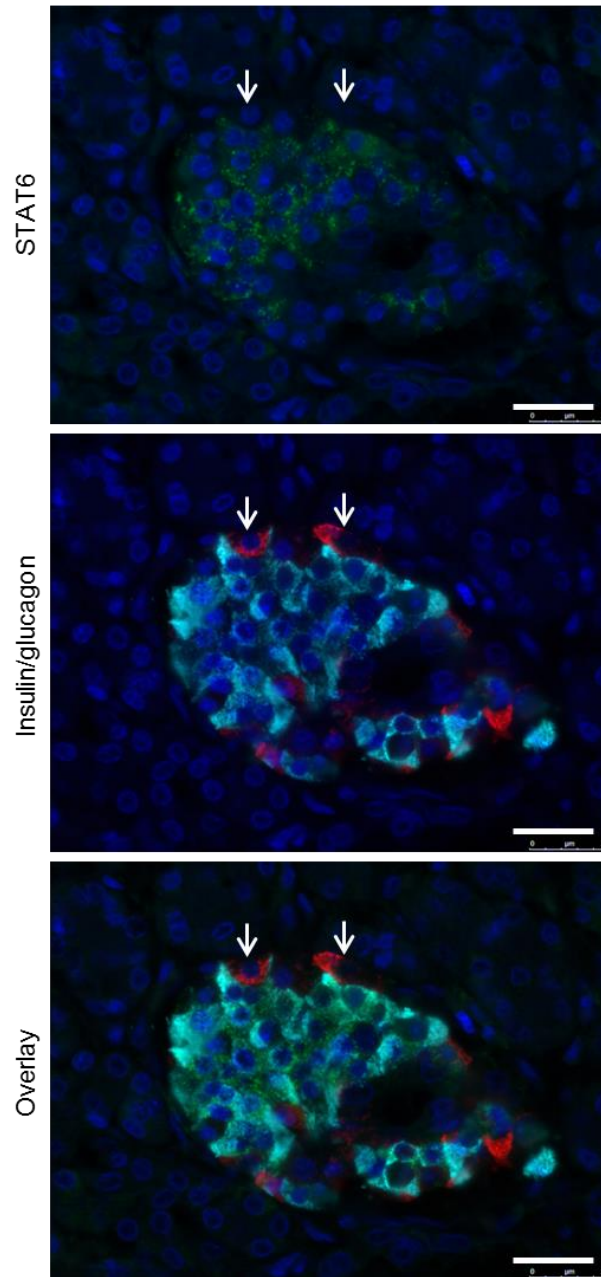

**ESM Fig. 2. STAT6 is expressed in human pancreatic  $\beta$ -cells.** A FFPE pancreas section from a control donor was stained using antibodies detecting STAT6 (green), glucagon (red) and insulin (light blue). Arrows indicated glucagon positive cells which do not have detectable STAT6 staining. Images are representative of islets on the section stained. Scale bars = 25 $\mu$ m.

ESM Fig.3

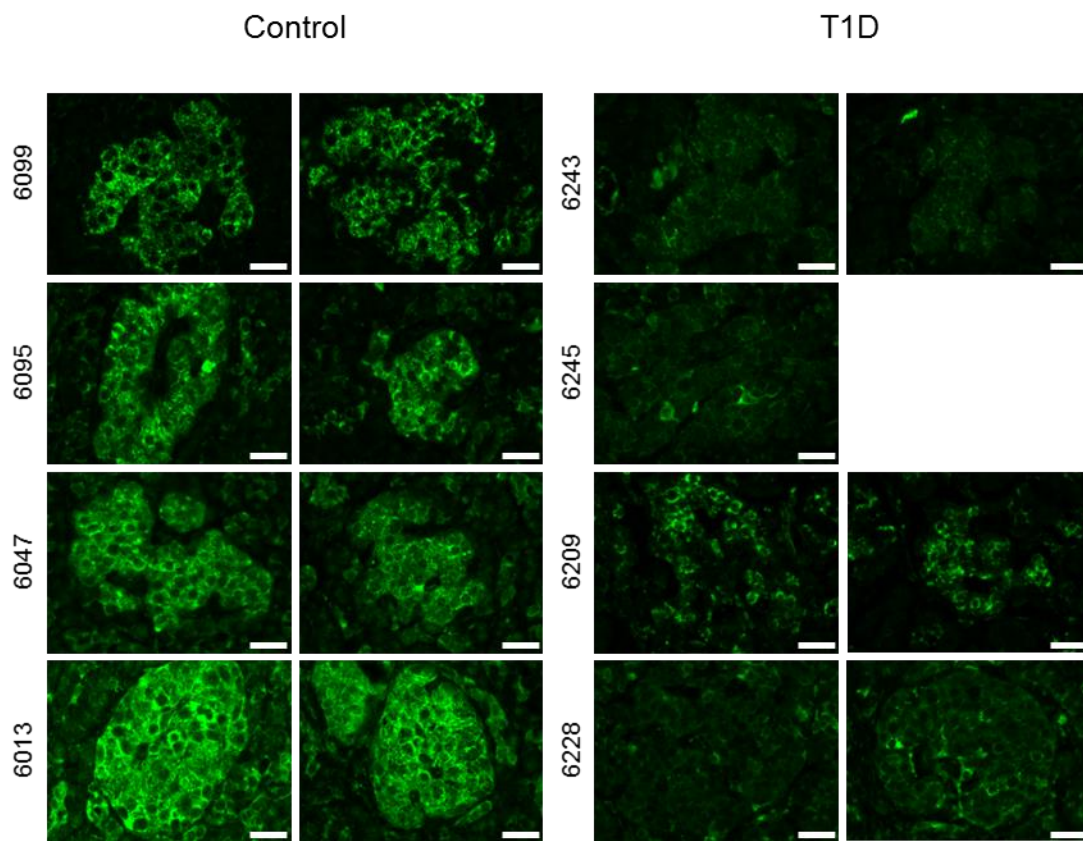

**ESM Fig. 3. STAT6 expression is diminished in the pancreatic islets of patients with type 1 diabetes from the nPOD cohort.** An immunofluorescence approach was employed to stain 8 pancreas sections from the nPOD collection, 4 from control donors and 4 from individuals with type 1 diabetes. Sections were stained for STAT6 (green) and insulin (not shown). Images of ICIs from each case were collected at identical settings, and two representative images from each case are presented. Only a single ICI was found on the section examined from subject 6245. Scale bars = 25 $\mu$ m.
